# Supplementary material
Source: PubMed Central journal article supplement (PMC7755168)
Supplement: ehp6729.smcontents.508.pdf [file ehp6729.smcontents.508.pdf]

**Note to readers with disabilities:** *EHP* strives to ensure that all journal content is accessible to all readers. However, some figures and Supplemental Material published in *EHP* articles may not conform to [508 standards](#) due to the complexity of the information being presented. If you need assistance accessing journal content, please contact [ehp508@niehs.nih.gov](mailto:ehp508@niehs.nih.gov). Our staff will work with you to assess and meet your accessibility needs within 3 working days.

### **Supplemental Material**

#### **The Association between Residential Green Space in Childhood and Development of Attention Deficit Hyperactivity Disorder: A Population-Based Cohort Study**

Malene Thygesen, Kristine Engemann, Gitte J. Holst, Birgitte Hansen, Camilla Geels, Jørgen Brandt, Carsten B. Pedersen, and Søren Dalsgaard

#### **Table of Contents**

**Figure S1.** Definition of study population.

**Table S1.** IRRs for ADHD by NDVI within the first five years of life and stratified by year of birth, sex, region, urbanicity, parental SES and neighborhood level SES (with interaction term).

**Table S2.** IRRs for ADHD by NDVI within different proximities around residential address.

**Table S3.** Incidence rate ratios (IRRs) for ADHD by NDVI at different ages within an exposure zone of 210 × 210 m.

**Table S4.** IRRs for ADHD by NDVI among firstborn children.
